# Supplementary material for: Unraveling the lattice thermal conductivity and thermoelectric properties of monolayer Mg3Bi2
Source: Royal Society of Chemistry journal article supplement (doi:10.1039/d5cp01499a), 2025-01-01
Supplement: d5cp01499a1.pdf [file d5cp01499a1.pdf]

**Supplemental Material:**

**Unraveling the lattice thermal conductivity and thermoelectric properties of  
monolayer  $\text{Mg}_3\text{Bi}_2$**

Yingying Chen<sup>a</sup>, Zheng Ma<sup>b,c</sup>, Na Zhao<sup>d</sup>, Yajun Li<sup>e</sup>, Xi Yao<sup>f</sup>, Xilong Dou<sup>f\*</sup>

<sup>a</sup> College of Physics and Electronic Information Engineering, Hubei Engineering University,

Xiaogan, Hubei 432000, China

<sup>b</sup> School of Automobile, Chang'an University, Xi'an, Shaanxi 710064, China

<sup>c</sup> Department of Mechanical Engineering, Texas A&M University, College Station, TX 77840 USA

<sup>d</sup> School of Finance and Economics Management, Sichuan University of Arts and Science, Dazhou, Sichuan  
635000, China

<sup>e</sup> Engineering Research Center of Integrated Circuit Packaging and Testing, Ministry of Education,  
Tianshui Normal University, Tianshui, Gansu 741001, China

<sup>f</sup> School of Mathematics and Physics, Lanzhou Jiaotong University, Lanzhou, Gansu 730070, China

\* Corresponding author      Email addresses: xilongdou369@163.com

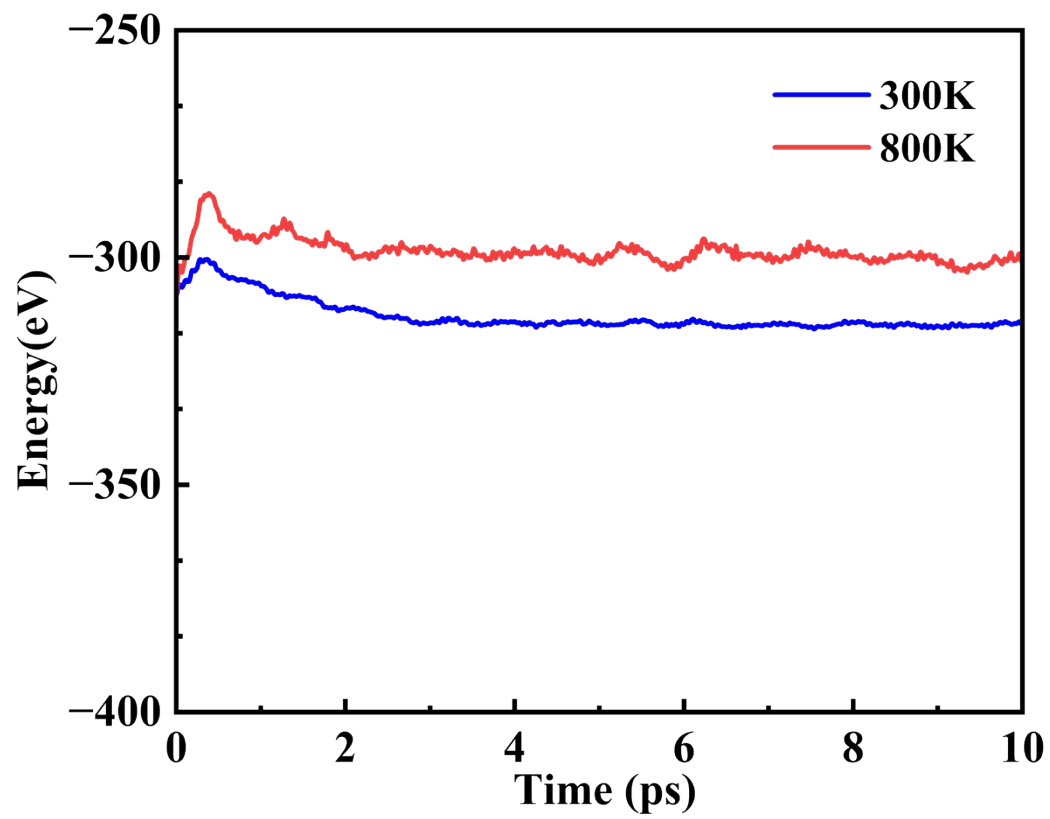

Fig. S1. Energy fluctuations of monolayer  $\text{Mg}_3\text{Bi}_2$  in AIMD simulations at 300K and 800K.

The formation energy ( $E_f$ ) of each structure can be calculated by the following formula:

$$E_f = (E_{total} - n_{Mg}E_{Mg} - n_{Bi}E_{Bi}) / (n_{Mg} + n_{Bi}) \quad (1)$$

where  $E_{total}$ ,  $E_{Mg}$  and  $E_{Bi}$  are the total energy of the system, the energy of Mg and Bi atoms, respectively.  $n_{Mg}$  and  $n_{Bi}$  are the number of Mg and Bi atoms in the unit cell, respectively.

The elastic energy  $U(\varepsilon)$  of 2D materials using standard Voigt notation can be expressed as [1]:

$$U(\varepsilon) = \frac{1}{2}C_{11}\varepsilon_{xx}^2 + \frac{1}{2}C_{22}\varepsilon_{yy}^2 + C_{12}\varepsilon_{xx}\varepsilon_{yy} + 2C_{66}\varepsilon_{xy}^2, \quad (2)$$

where the  $\varepsilon_{ij}$  ( $i, j=x, y$ ) and  $C_{ij}$  ( $i, j=1, 2, 6$ ) are the strain tensors and elastic constants, respectively. The  $C_{ij}$  can be gained from the second partial derivative of strain energy with respect to strain ( $C_{ij} = (1/S_0)(\partial^2 U(\varepsilon) / \partial \varepsilon_i \partial \varepsilon_j)$ ), where  $S_0$  is the area of the equilibrium unit cell. The strain range is from -2% to 2% with the step of 0.05%. Meanwhile, the orientation-dependent mechanical properties, including the in-plane Young's modulus  $E(\theta)$  and Poisson's ratio  $\nu(\theta)$ , can be calculated based on the elastic constants via the following equations [2]:

$$E(\theta) = \frac{C_{11}C_{22} - C_{12}^2}{C_{11}\sin^4\theta + C_{22}\cos^4\theta + \left(\frac{C_{11}C_{22} - C_{12}^2}{C_{66}} - 2C_{12}\right)\sin^2\theta\cos^2\theta} \quad (3)$$

$$\nu(\theta) = \frac{C_{12}(\sin^4\theta + \cos^4\theta) - \left(C_{11} + C_{22} - \frac{C_{11}C_{22} - C_{12}^2}{C_{66}}\right)\sin^2\theta\cos^2\theta}{C_{11}\sin^4\theta + C_{22}\cos^4\theta + \left(\frac{C_{11}C_{22} - C_{12}^2}{C_{66}} - 2C_{12}\right)\sin^2\theta\cos^2\theta} \quad (4)$$

The orientation-dependent  $Y(\theta)$  and  $\nu(\theta)$  and the corresponding polar diagram are

plotted in Fig. S1. The Voigt and Reuss estimated bulk ( $B^V, B^R$ ) and shear moduli ( $G^V, G^R$ ) of 2D materials can be calculated from the following formulas [3, 4]:

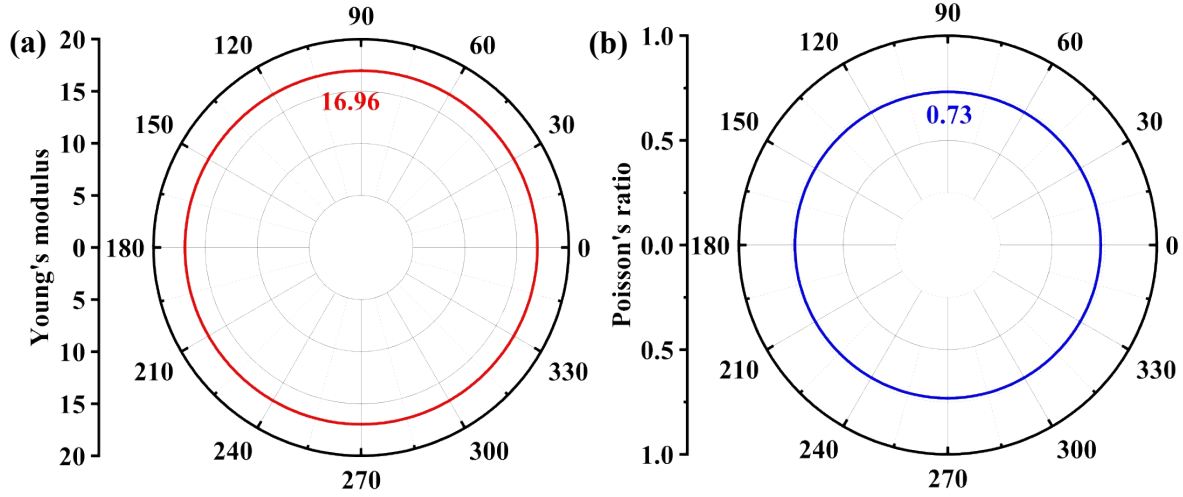

$$B^V = B^R = \frac{C_{11} + C_{12}}{2}, \quad (5)$$

$$G^V = G^R = \frac{C_{11} - C_{12}}{2}, \quad (6)$$

$$B = (B^V + B^R)/2, \quad (7)$$

$$G = (G^V + G^R)/2, \quad (8)$$

where  $B$  and  $G$  represent bulk ( $B$ ) and shear modulus, respectively. The calculated results are shown in Table S1.

Fig. S2. Orientation-dependent (a) Young's modulus and (b) Poisson's ratio for monolayer  $\text{Mg}_3\text{Bi}_2$ .

Table S1. Elastic constants, elastic compliance constants, bulk modulus, shear modulus, Young's modulus, and Poisson's ratio for monolayer  $\text{Mg}_3\text{Bi}_2$ .

| Structure                | $C_{11}=C_{22}$<br>(N/m) | $C_{12}$<br>(N/m) | $C_{66}$<br>(N/m) | $S_{11}$<br>(m/N) | $S_{12}$<br>(m/N) | $S_{66}$<br>(m/N) | $B$<br>(N/m) | $G$<br>(N/m) | $\nu$ | $E$<br>(N/m) |
|--------------------------|--------------------------|-------------------|-------------------|-------------------|-------------------|-------------------|--------------|--------------|-------|--------------|
| $\text{Mg}_3\text{Bi}_2$ | 36.49                    | 26.69             | 4.90              | 0.058             | -0.043            | 0.204             | 31.59        | 4.89         | 0.73  | 16.96        |

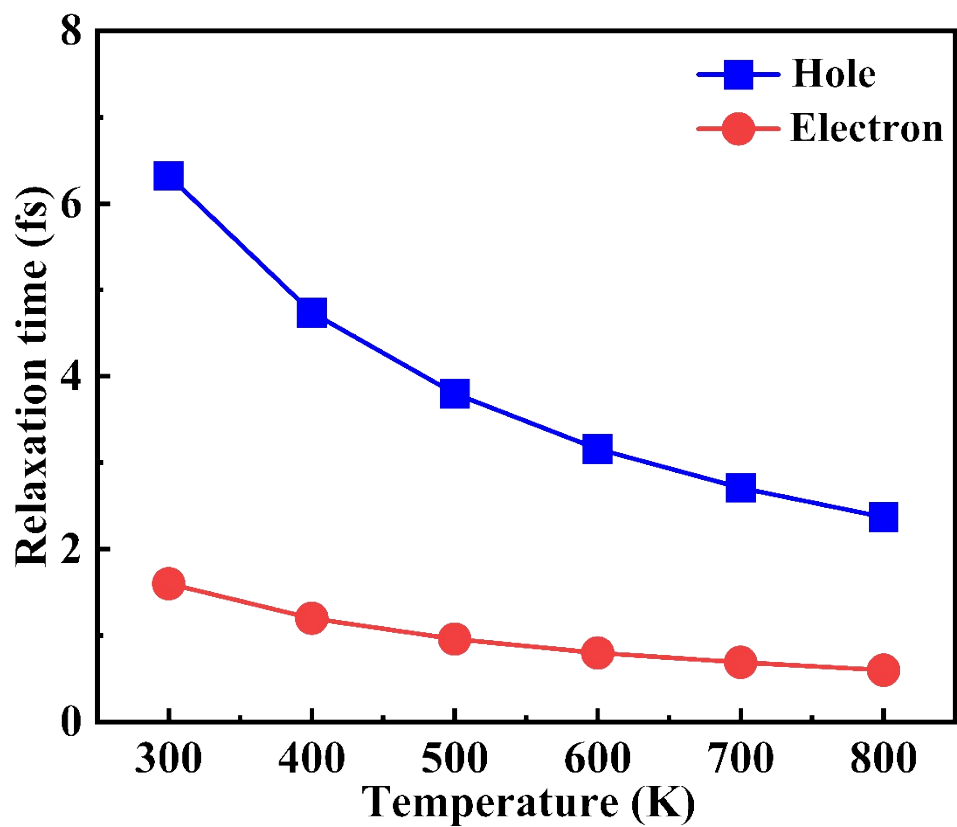

Fig. S3. Relaxation time for monolayer  $\text{Mg}_3\text{Bi}_2$ .

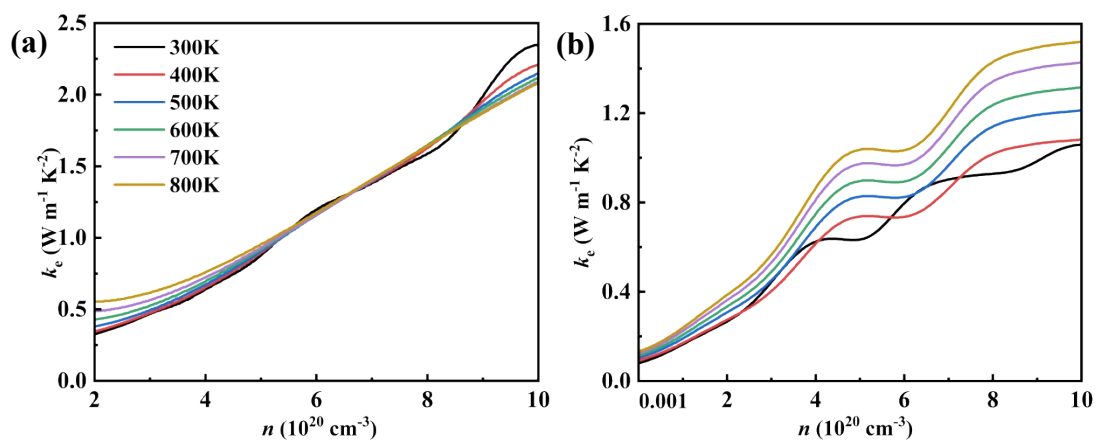

Fig. S4. Electrical thermal conductivity  $k_e$  as a function of carrier concentration for (a)  $p$ -type and (b)  $n$ -type monolayer  $\text{Mg}_3\text{Bi}_2$ .

Table S2. Comparison of electrical properties of  $p$ -type monolayer  $\text{Mg}_3\text{Bi}_2$ .

| Methods              | $n$<br>( $10^{20} \text{ cm}^{-3}$ ) | $\sigma$<br>( $10^4 \text{ S m}^{-1}$ ) | $S$<br>( $\mu\text{VK}^{-1}$ ) | $PF$<br>( $\text{mWm}^{-1}\text{K}^{-2}$ ) | $ZT$ | $T$ (K) | Refs.     |
|----------------------|--------------------------------------|-----------------------------------------|--------------------------------|--------------------------------------------|------|---------|-----------|
| DFT                  | 5.07                                 | 12.26                                   | 50.60                          | 0.32                                       | 0.08 | 300     | This work |
| Magnetron sputtering | 4.24                                 | 17.20                                   | 45.76                          | 0.32                                       | 0.08 | 300     | [5]       |
| Magnetron sputtering | /                                    | 39.46                                   | 52.8                           | 1.1                                        | /    | 393     | [6]       |
| Magnetron sputtering | 4                                    | 29.41                                   | 82                             | 1.97                                       | /    | 300     | [7]       |
| Magnetron sputtering | /                                    | 32.05                                   | 53                             | 0.89                                       | /    | 565     | [8]       |
| Thermal evaporation  | 4.5                                  | 83.5                                    | 60.1                           | 3.02                                       | 0.11 | 473     | [9]       |

## References

- [1] B. Peng, H. Zhang, H. Shao, Y. Xu, G. Ni, and R. Zhang, Phonon transport properties of two-dimensional group-IV materials from ab initio calculations, *Phys. Rev. B* 94, (2016): 245420.
- [2] Y. Xu, Y. Liu, Y. Chen, Y. Zhang, C. Ma, H. Zhang, S. Sun, and Y. Ji, *ACS Appl. Mater. Interfaces* 12, (2020): 58349-58359.
- [3] R. Li, Q. Shao, E. Gao, and Z. Liu, Elastic anisotropy measure for two-dimensional

crystals, *Extreme Mech. Lett.* 34, (2020): 100615.

- [4] Z. Wu, E. Zhao, H. Xiang, X. Hao, X. Liu, and J. Meng, Crystal structures and elastic properties of superhard  $\text{IrN}_2$  and  $\text{IrN}_3$  from first principles, *Phys. Rev. B* 76, (2007): 054115.
- [5] Y. Ran, W. Ma, H. Yu, W. Li, D. Zhou, F. Wang, N. Gao, Z. Yu, and K. Tai, Enhanced thermoelectric performance of  $\text{Mg}_3\text{Sb}_{2-x}\text{Bi}_x$  thermoelectric thin films through carrier concentration modulation by Bi alloying, *J. Alloys Compd.* 985, (2024): 174028.
- [6] W. Fang, W. Zhu, Y. Shao, P. Zheng, J. Si, Formation of metastable cubic phase and thermoelectric properties in  $\text{Mg}_3\text{Bi}_2$  films deposited by magnetron sputtering, *Appl. Surf. Sci.* 596, (2022) 153602.
- [7] G. Sadowski, Y. Zhu, R. Shu, T. Feng, A. Febvrier, D. Music, W. Liu, P. Eklund, Epitaxial growth and thermoelectric properties of  $\text{Mg}_3\text{Bi}_2$  thin films deposited by magnetron sputtering, *Appl. Phys. Lett.* 120, (2022) 051901.
- [8] J. Tani, H. Ishikawa, Fabrication and analysis of  $\text{Mg}_3\text{Bi}_2$  thin films by post annealing Mg/Bi bilayer thin films, *Mater. Lett.* 331, (2022) 133460.
- [9] J. W. C. Reinders, C. Roldán-Carmona, H.J. Bolink, F. Palazon, Tunable p- and n-Type Tellurium-Free  $\text{Mg}_3\text{Bi}_2$  Thermoelectric Thin Films by Thermal Coevaporation, *ACS Appl. Energy Mater.* 6, (2023) 10327-10332.
